# Supplementary material
Source: publisher figshare collection journal article supplement (https://frontiersin.figshare.com/ndownloader/files/14965061)
Supplement: Supplementary file [file 14965061]

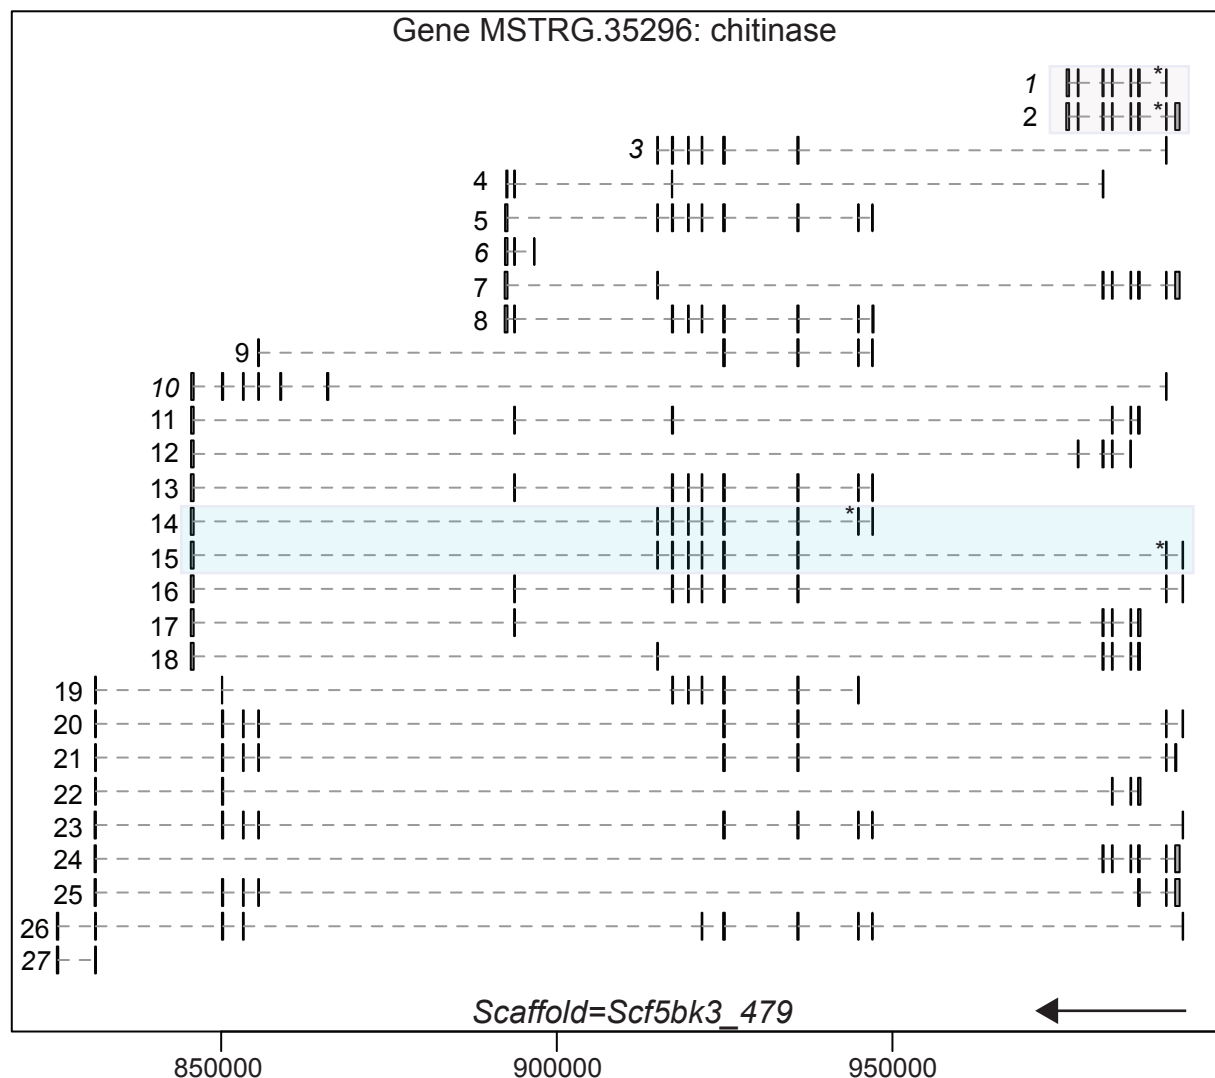

**Transcript key:** 1-aug3.g6418.t1, 2-MSTRG.35296.26, 3-aug3.g6417.t1, 4-MSTRG.35296.24, 5-MSTRG.35296.23, 6-aug3.g20179.t1, 7-MSTRG.35296.21, 8-MSTRG.35296.20, 9-MSTRG.35296.19, 10-aug3.g20180.t1, 11-MSTRG.35296.17, 12-MSTRG.35296.16, 13-MSTRG.35296.15, 14-MSTRG.35296.14, 15-MSTRG.35296.12, 16-MSTRG.35296.10, 17-MSTRG.35296.11, 18-MSTRG.35296.13, 19-MSTRG.35296.9, 20-MSTRG.35296.6, 21-MSTRG.35296.8, 22-MSTRG.35296.7, 23-MSTRG.35296.3, 24-MSTRG.35296.5, 25-MSTRG.35296.4, 26-MSTRG.35296.1, 27-aug3.g16938.t1

Figure S3. Above is the exon-intron structure of transcripts predicted for locus MSTRG.35296, with homology to chitinases. The two novel transcripts that produce a novel protein identified in venom by MS data are highlighted in light blue. A second set of two transcripts that each produce a second protein also identified in venom are shaded light purple. Transcripts are numbered in the figure due to space constraints and labels are below. Transcripts prefixed with MSTRG are novel to this study, whereas those prefixed with aug3 are from the original genome annotation, with numbers in italics. \* indicates an exon producing the identical first 22 amino acids of predicted proteins from the two sets of two transcripts. The arrow indicates inferred direction of transcription. Spliced read counts for novel junctions are found in Table S3, but not included in the figure due to space considerations. The alignment of the two distinct protein sequences identified in venom by Scaffold is shown below. Each protein sequence is encoded by two distinct transcripts. MSTRG.35296.12 and MSTRG.35296.14 are novel transcripts that encode the same novel protein by combining exons across genes in the original genome annotation, and this protein was identified in venom.

```

*****
MSTRG.35296.12 MDLKAI SVILLLSVAFASAASKDRNNKKYRVV CYLGSWANYRPGAGKFLIEHIDPFLCTHVIYGFAGKLAGNKIAAYDPYL
MSTRG.35296.14 MDLKAI SVILLLSVAFASAASKDRNNKKYRVV CYLGSWANYRPGAGKFLIEHIDPFLCTHVIYGFAGKLAGNKIAAYDPYL
MSTRG.35296.26 MDLKAI SVILLLSVAFASAASK-----
aug3.g6418.t1 MDLKAI SVILLLSVAFASAASK-----

```

```

**:*:*****:***** *:*****:*****:*****:*****
MSTRG.35296.12 DLKENWGLGAFORFNALKKANPNLTTLIAIGGWNEGSKKYSEMAANPAARATFIQSVISFCEKYGFDGLDMDWEYPANRG
MSTRG.35296.14 DLKENWGLGAFORFNALKKANPNLTTLIAIGGWNEGSKKYSEMAANPAARATFIQSVISFCEKYGFDGLDMDWEYPANRG
MSTRG.35296.26 -----GAYORFNALKKANPNLTTLIAIGGWDEGSKKYSAMAADPAARATFIKSVISFCEKYGFDGLDMDWEYPANRG
aug3.g6418.t1 -----GAYORFNALKKANPNLTTLIAIGGWDEGSKKYSAMAADPAARATFIKSVISFCEKYGFDGLDMDWEYPANRG

```

```

*****.*****:*****:*****:*****:*****:*****
MSTRG.35296.12 GKPEDKENFVALLRELKAAFASHGYLLTAAVSAGVKIMDTAYNIPEVSKYLDFINVMAYDLHGSWEKVVGHNAPMRVRPE
MSTRG.35296.14 GKPEDKENFVALLRELKAAFASHGYLLTAAVSAGVKIMDTAYNIPEVSKYLDFINVMAYDLHGSWEKVVGHNAPMRVRPE
MSTRG.35296.26 GKPEDKENFAVLLRELKAAFASNGYLLTAAVSAGVKIMDTAYNIPEISKHLDFINVMAYDFHGSWDEVVGHNAPMRVRPE
aug3.g6418.t1 GKPEDKENFAVLLRELKAAFASNGYLLTAAVSAGVKIMDTAYNIPEISKHLDFINVMAYDFHGSWDEVVGHNAPMRVRPE

```

```

***:*:*****:*****:*****:*****:*****
MSTRG.35296.12 EKDDERTLNVEYAINYWINKGAPRNKIVLGMGLYGRSFTLTDPSTDLGSPAKGPGRGGPITKEPGMLGYNEICLNKQG
MSTRG.35296.14 EKDDERTLNVEYAINYWINKGAPRNKIVLGMGLYGRSFTLTDPSTDLGSPAKGPGRGGPITKEPGMLGYNEICLNKQG
MSTRG.35296.26 EKDGQRTLNVEYAINYWINKGAPRNKIVLGMGLYGRSFTLTDPSTDLGSPAKGPGRGGPITKEPGMLGYNEICLNKQG
aug3.g6418.t1 EKDGQRTLNVEYAINYWINKGAPRNKIVLGMGLYGRSFTLTDPSTDLGSPAKGPGRGGPITKEPGMLGYNEICLNKQG

```

```

***** *****:*****:*****:*****
MSTRG.35296.12 WKEVVPDKVDAPYAYS GDQWVG YDDKKSIGIKVDYLIKEGLGGGMVWSLETDDFRGNCYGEKYPLLAIHYTKLNGPVVVRP
MSTRG.35296.14 WKEVVPDKVDAPYAYS GDQWVG YDDKKSIGIKVDYLIKEGLGGGMVWSLETDDFRGNCYGEKYPLLAIHYTKLNGPVVVRP
MSTRG.35296.26 WKEVVPDKVDAPYAYS GDQWVG YDDKKSIGIKVDYLIKEGLGGGMVWSLETDDFRGNCYGEKYPLLAIHYTKLNGPVVVRP
aug3.g6418.t1 WKEVVPDKVDAPYAYS GDQWVG YDDKKSIGIKVDYLIKEGLGGGMVWSLETDDFRGNCYGEKYPLLAIHYTKLNGPVVVRP

```

```

*****:*****.*** *****:***** *:***** *****:*****:*****
MSTRG.35296.12 TINPNIRPTVGPKPTGKPKGFTCPGEGYFRDPHNCVFHYCVQVSKWEMARHTYNCGADSAFDEASKTCVLRKHVPGC
MSTRG.35296.14 TINPNIRPTVGPKPTGKPKGFTCPGEGYFRDPHNCVFHYCVQVSKWEMARHTYNCGADSAFDEASKTCVLRKHVPGC
MSTRG.35296.26 TINPNIRPTVGPKPTGKPKGFTCPGEGYFRDPHNCVFHYCVQVSKWEMARHTYNCGADSAFDEASKTCVLRKHVPGC
aug3.g6418.t1 TINPNIRPTVGPKPTGKPKGFTCPGEGYFRDPHNCVFHYCVQVSKWEMARHTYNCGADSAFDEASKTCVLRKHVPGC

```
